# Supplementary material for: Reply to comment on “On the reproduction of Li3Fe2(HPO3)3Cl—a short discussion on “Li3Fe2(HPO3)3Cl: an electroactive iron phosphite as a new polyanionic cathode material for Li-ion battery”
Source: Royal Society of Chemistry journal article supplement (doi:10.1039/c9ta03476e), 2019-01-01
Supplement: c9ta03476e1.pdf [file c9ta03476e1.pdf]

Electronic Supplementary Information

Reply to comment on “On the reproduction of  $\text{Li}_3\text{Fe}_2(\text{HPO}_3)_3\text{Cl}$ —a short discussion on “ $\text{Li}_3\text{Fe}_2(\text{HPO}_3)_3\text{Cl}$ : an electroactive iron phosphite as a new polyanionic cathode material for Li-ion battery”

Hooman Yaghoobnejad Asl,<sup>a</sup> Kartik Ghosh,<sup>b</sup> Melissa P. Vidal Meza,<sup>c</sup> Prashanth Sandineni,<sup>a</sup> and Amitava Choudhury\*<sup>a</sup>

<sup>a</sup> Department of Chemistry, Missouri University of Science and Technology, Rolla, MO 65409, USA.

<sup>b</sup> Department of Physics, Astronomy and Materials Science and Center for Applied Science and Engineering, Missouri State University, Springfield, MO 65897, USA.

<sup>c</sup> Department of Chemical and Biological Engineering, Missouri University of Science and Technology, Rolla, MO 65409, USA.

<sup>d</sup> Corresponding author: Fax: (573)341-6033; Tel:(573)341-6332.

<sup>e</sup> \* E-mail: choudhury@mst.edu

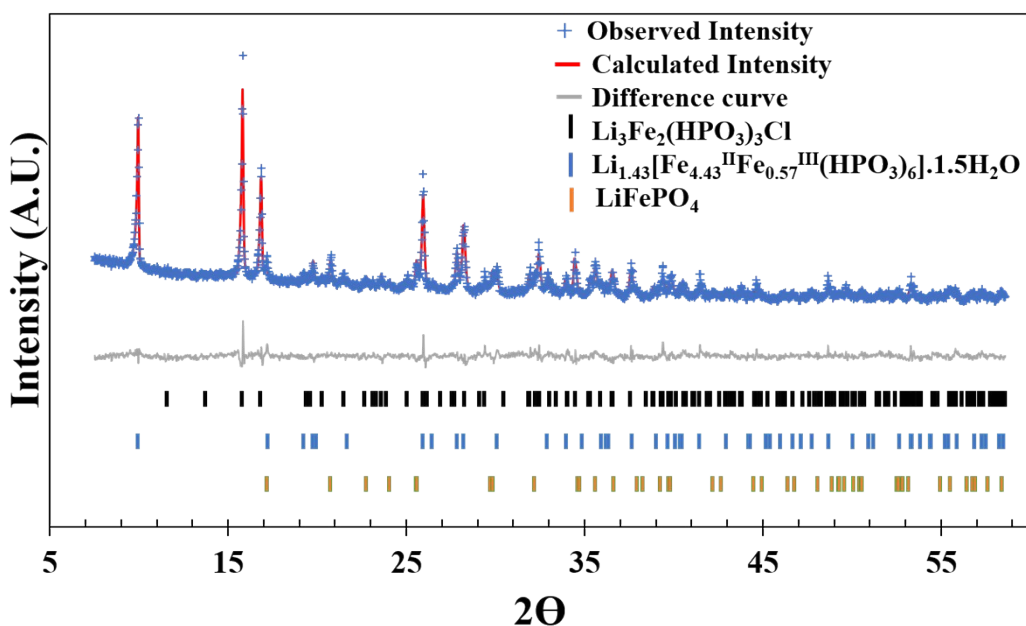

**Figure S1.** The Rietveld refinement employing GSAS-II (Toby & Von Dreele, J. Appl. Cryst. 46, 544-549, 2013), showing the observed, calculated and difference curve after the quantitative refinement of three-phases yielding 43%, 36% and 21% for  $\text{Li}_3\text{Fe}_2(\text{HPO}_3)_3\text{Cl}$ ,  $\text{Li}_{1.43}[\text{Fe}_{4.43}^{\text{II}}\text{Fe}_{0.57}^{\text{III}}(\text{HPO}_3)_6]\cdot 1.5\text{H}_2\text{O}$ , and  $\text{LiFePO}_4$ , respectively. The final residual was  $wR = 3.33\%$ .
